# Supplementary material for: Efficient extracellular laccase secretionviabio-designed secretory apparatuses to enhance bacterial utilization of recalcitrant lignin
Source: Royal Society of Chemistry journal article supplement (doi:10.1039/d0gc04084c), 2021-01-01
Supplement: d0gc04084c1.pdf [file d0gc04084c1.pdf]

**Table S1 Plasmids and bacterial strains used in this study.** Summarized details of plasmids and recombinant A514 strains, including replicon, antibiotic resistance, functional elements, and source.

| Strain or Plasmid  | Relevant characteristic(s) <sup>a</sup>                                              | Source or Reference   |
|--------------------|--------------------------------------------------------------------------------------|-----------------------|
| <b>Plasmids</b>    |                                                                                      |                       |
| pPROBE-GT          | pVS1/p15a Gm <sup>r</sup> gfp                                                        | (Miller et al., 2000) |
| pUC57-Pmin-tat-lac | Amp <sup>r</sup> ; P <sub>min</sub> ::tat-Laccase                                    | Personalbio Company   |
| pUCP18-Gm          | Amp <sup>r</sup> ; Gm <sup>r</sup> , shuttle vector; lacZ with MCS                   | (23)                  |
| pGlac              | pPROBE-GT derivative, P <sub>xyIA</sub> ::Laccase                                    | This study            |
| pUlac              | pUCP18-Gm derivative, P <sub>xyIA</sub> ::Laccase                                    | This study            |
| pUI                | pUCP18-Gm derivative, P <sub>min</sub> ::ABC transporters                            | This study            |
| pUI-2539           | pUI derivative, P <sub>xyIA</sub> ::His-tag-Laccase-2539 C-terminal signal sequence  | This study            |
| pUI-2549           | pUI derivative, P <sub>xyIA</sub> ::His-tag-Laccase-2549 C-terminal signal sequence  | This study            |
| pUI-rnb            | pUI derivative, His-tag-laccase-C-terminal signal sequence of 2549-T1/T2 terminators | This study            |
| pGoprI             | pPROBE-GT derivative, P <sub>xyIA</sub> ::oprI-Laccase-His-tag                       | This study            |
| pGpbP              | pPROBE-GT derivative, P <sub>xyIA</sub> ::pbP-Laccase-His-tag                        | This study            |
| pGpelB             | pPROBE-GT derivative, P <sub>xyIA</sub> ::pelB-Laccase-His-tag                       | This study            |
| pGtat              | pPROBE-GT derivative, P <sub>xyIA</sub> ::tat-Laccase-His-tag                        | This study            |
| pG0383             | pPROBE-GT derivative, P <sub>xyIA</sub> ::0380-Laccase-His-tag                       | This study            |
| pG0620             | pPROBE-GT derivative, P <sub>xyIA</sub> ::0620-Laccase-His-tag                       | This study            |
| pG1543             | pPROBE-GT derivative, P <sub>xyIA</sub> ::1543-Laccase-His-tag                       | This study            |
| pG1921             | pPROBE-GT derivative, P <sub>xyIA</sub> ::1921-Laccase-His-tag                       | This study            |

|                              |                                                                                                      |            |
|------------------------------|------------------------------------------------------------------------------------------------------|------------|
| pG2816                       | pPROBE-GT derivative, P <sub>xyIA</sub> ::2816-Laccase-His·tag                                       | This study |
| pG4529                       | pPROBE-GT derivative, P <sub>xyIA</sub> ::4529-Laccase-His·tag                                       | This study |
| pG4580                       | pPROBE-GT derivative, P <sub>xyIA</sub> ::4580-Laccase-His·tag                                       | This study |
| pU2816                       | pUCP18-Gm derivative, P <sub>xyIA</sub> ::2816-His·tag-Laccase                                       | This study |
| pUV-ABC-2816                 | pU2816 derivative, P <sub>van</sub> ::tatABC                                                         | This study |
| pUM-ABC-2816                 | pU2816 derivative, P <sub>min</sub> ::tatABC                                                         | This study |
| pUV-1761                     | pU2816 derivative, P <sub>xyIA</sub> ::2816-His·tag-Laccase-1761 β domain                            | This study |
| pUV-2541A                    | pU2816 derivative, P <sub>xyIA</sub> ::2816-His·tag-Laccase-2541A β domain                           | This study |
| pUV-3548                     | pU2816 derivative, P <sub>xyIA</sub> ::2816-His·tag-Laccase-3548 β domain                            | This study |
| pUV-4947                     | pU2816 derivative, P <sub>xyIA</sub> ::2816-His·tag-Laccase-4947 β domain                            | This study |
| pUV2541B                     | pU2816 derivative, P <sub>xyIA</sub> ::2816-His·tag-Laccase-2541B β domain                           | This study |
| pUV-2541C                    | pU2816 derivative, P <sub>xyIA</sub> ::2816-His·tag-Laccase-2541C β domain                           | This study |
| pUV-2541D                    | pU2816 derivative, P <sub>xyIA</sub> ::2816-His·tag-Laccase-2541D β domain                           | This study |
| pUV-rnb                      | pU2816 derivative, P <sub>xyIA</sub> ::2816-His·tag-2541D β domain                                   | This study |
| pUVV-ABC-2541D               | pUV-2541D derivative, P <sub>van</sub> ::tatABC                                                      | This study |
| pUVM-ABC-2541D               | pUV-2541D derivative, P <sub>min</sub> ::tatABC                                                      | This study |
| pUV-thromobin-2541D          | pUV-2541D derivative, P <sub>xyIA</sub> ::2816-His·tag-Laccase-thrombin cleavage site-2541D β domain | This study |
| pUV-MHT <sup>a</sup> - 2541A | pUV-2541A derivative, P <sub>xyIA</sub> ::2816-MHT-2541A β domain                                    | This study |
| pUV-MHT- 2541B               | pUV-2541B derivative, P <sub>xyIA</sub> ::2816-MHT-2541B β domain                                    | This study |
| pUV-MHT- 2541C               | pUV-2541C derivative, P <sub>xyIA</sub> ::2816-MHT-2541C β domain                                    | This study |
| pUV-MHT- 2541D               | pUV-2541D derivative, P <sub>xyIA</sub> ::2816-MHT-2541D β domain                                    | This study |
| pUV-MHT-Lac-2541A            | pUV-2541A derivative, P <sub>xyIA</sub> ::2816-MHT-Laccase-2541A β domain                            | This study |

---

|                       |                                                                                     |            |
|-----------------------|-------------------------------------------------------------------------------------|------------|
| pUV-MHT-Lac-2541B     | pUV-2541B derivative, P <sub>xyIA</sub> ::2816-MHT-Laccase-2541B β domain           | This study |
| pUV-MHT-Lac-2541C     | pUV-2541C derivative, P <sub>xyIA</sub> ::2816-MHT-Laccase-2541C β domain           | This study |
| pUV-MHT-Lac-2541D     | pUV-2541D derivative, P <sub>xyIA</sub> ::2816-MHT-Laccase-2541D β domain           | This study |
| <b>Strains</b>        |                                                                                     |            |
| <i>E. coli</i> Mach I | F- <i>delta lacX74 hsdR(rk<sup>-</sup> mk<sup>+</sup>) delta rec1398 endA1 tonA</i> | Takara     |
| <i>P. putida</i> A514 | Wild type                                                                           | This study |
| A <sub>pGT</sub>      | A514 carrying pPROBE-GT                                                             | This study |
| A <sub>pGlac</sub>    | A514 carrying pGT-lac                                                               | This study |
| A <sub>pGoprI</sub>   | A514 carrying pGoprI                                                                | This study |
| A <sub>pGpbp</sub>    | A514 carrying pGpbp                                                                 | This study |
| A <sub>pGpelb</sub>   | A514 carrying pGpelb                                                                | This study |
| A <sub>pGtat</sub>    | A514 carrying pGtat                                                                 | This study |
| A <sub>pG383</sub>    | A514 carrying pG383                                                                 | This study |
| A <sub>pG620</sub>    | A514 carrying pG620                                                                 | This study |
| A <sub>pG1543</sub>   | A514 carrying pG1543                                                                | This study |
| A <sub>pG1921</sub>   | A514 carrying pG1921                                                                | This study |
| A <sub>pG2816</sub>   | A514 carrying pG2816                                                                | This study |
| A <sub>pG4529</sub>   | A514 carrying pG4529                                                                | This study |
| A <sub>pG4580</sub>   | A514 carrying pG4580                                                                | This study |
| A <sub>pU</sub>       | A514 carrying pUCP18-Gm                                                             | This study |
| A <sub>pUlac</sub>    | A514 carrying pUlac                                                                 | This study |
| A <sub>pUI-2539</sub> | A514 carrying pUI-2539                                                              | This study |
| A <sub>pUI-2549</sub> | A514 carrying pUI-2549                                                              | This study |

---

---

|                                  |                                  |            |
|----------------------------------|----------------------------------|------------|
| A <sub>p</sub> UI-rrnb           | A514 carrying pUI-rrnb           | This study |
| A <sub>p</sub> U2816             | A514 carrying pU2816             | This study |
| A <sub>p</sub> UV-ABC-2816       | A514 carrying pUV-ABC-2816       | This study |
| A <sub>p</sub> UM-ABC-2816       | A514 carrying pUM-ABC-2816       | This study |
| A <sub>p</sub> UV-1761           | A514 carrying pUV-1761           | This study |
| A <sub>p</sub> UV-2541A          | A514 carrying pUV-2541A          | This study |
| A <sub>p</sub> UV-3548           | A514 carrying pUV-3548           | This study |
| A <sub>p</sub> UV-4947           | A514 carrying pUV-4947           | This study |
| A <sub>p</sub> UV-2541B          | A514 carrying pUV-2541B          | This study |
| A <sub>p</sub> UV-2541C          | A514 carrying pUV-2541C          | This study |
| A <sub>p</sub> UV-2541D          | A514 carrying pUV-2541D          | This study |
| A <sub>p</sub> UV-rrnb           | A514 carrying pUV-rrnb           | This study |
| A <sub>p</sub> UVV-ABC-2541D     | A514 carrying pUVV-ABC-2541D     | This study |
| A <sub>p</sub> UVM-ABC-2541D     | A514 carrying pUVM-ABC-2541D     | This study |
| A <sub>p</sub> UV-thrombin-2541D | A514 carrying pUV-thrombin-2541D | This study |
| A <sub>p</sub> UV-MHT-2541A      | A514 carrying pUV-MHT-2541A      | This study |
| A <sub>p</sub> UV-MHT-2541B      | A514 carrying pUV-MHT-2541B      | This study |
| A <sub>p</sub> UV-MHT-2541C      | A514 carrying pUV-MHT-2541C      | This study |
| A <sub>p</sub> UV-MHT-2541D      | A514 carrying pUV-MHT-2541D      | This study |
| A <sub>p</sub> UV-MHT-Lac-2541A  | A514 carrying pUV-MHT-Lac-2541A  | This study |
| A <sub>p</sub> UV-MHT-Lac-2541B  | A514 carrying pUV-MHT-Lac-2541B  | This study |
| A <sub>p</sub> UV-MHT-Lac-2541C  | A514 carrying pUV-MHT-Lac-2541C  | This study |
| A <sub>p</sub> UV-MHT-Lac-2541D  | A514 carrying pUV-MHT-Lac-2541D  | This study |

---

<sup>a</sup>MHT, epitope containing the Myc epitope, His epitope, and thrombin protease recognition sequence

**Table S2 Optimization of intracellular laccase production in the recombinant *P. putida* A514 strains.**

| Enzyme               | Strain             | Parameter          | Range                                       | Optimum range          | Optimum U/mL <sup>b</sup> | Activity     |  |
|----------------------|--------------------|--------------------|---------------------------------------------|------------------------|---------------------------|--------------|--|
| Laccase <sup>a</sup> | A <sub>pGLac</sub> | Origin             | \                                           | \                      | 0.73 ± 0.03               |              |  |
|                      |                    | pH                 | 5.0-8.0                                     | 6.0                    | 0.79 ± 0.20               |              |  |
|                      |                    | Metal ion          | Mn <sup>2+</sup>                            | 0-2 mM                 | 0                         | 0.66 ± 0.04  |  |
|                      |                    |                    | Cu <sup>2+</sup>                            | 0-0.2 mM               | 0.2 mM                    | 0.88 ± 0.12  |  |
|                      |                    |                    | Fe <sup>2+</sup>                            | 0 mM, 0.5mM and 1 mM   | 1 mM                      | 1.01 ± 0.11  |  |
|                      |                    |                    | Cu <sup>2+</sup> with 1 mM Fe <sup>2+</sup> | 0.5-2 mM               | 1 mM                      | 1.83 ± 0.12  |  |
|                      |                    | Temperature        | 20-30 °C                                    | 20 °C                  | 2.28 ± 0.09               |              |  |
|                      |                    | Shaker speed       | 50-200 rpm                                  | 100 rpm                | 3.44 ± 0.17               |              |  |
|                      |                    | Incubation time    | 24-72 h                                     | 60 h                   | 3.36 ± 0.06               |              |  |
|                      |                    | A <sub>pULac</sub> | Vectors                                     | pPROBE-GT<br>pUCP18-Gm | pUCP18-Gm                 | 99.73 ± 4.48 |  |

<sup>a</sup> For laccase activity, the absorption at 420 nm of intracellular extracts from A<sub>pUCP18</sub> or A<sub>pGT</sub> was employed as the blank control to eliminate the

interference of background enzyme activity.

<sup>b</sup>U/mL: the enzyme activity per one milliliter batch culture broth.

**Table S3 Optimization of extracellular laccase production in the recombinant *P. putida* A514 strains via the TISS strategy.**

| Enzyme         | Strain                | Parameter                                   | Range              | Optimum range | Optimum U/mL | Activity |
|----------------|-----------------------|---------------------------------------------|--------------------|---------------|--------------|----------|
| <b>Laccase</b> | A <sub>pUI-2549</sub> | OD600                                       | 0-7.5              | 7.5           | 2.85 ± 0.13  |          |
|                |                       | Time point of adding 2 mM xylose            | 0 h, 8 h and 14 h  | 8 h           | 5.72 ± 0.29  |          |
|                |                       | Shaker speed                                | 100-150 rpm        | 150 rpm       | 6.98 ± 0.31  |          |
|                |                       | Temperature                                 | 20-30 °C           | 25 °C         | 8.42 ± 0.41  |          |
|                |                       | Time point of adding 1 mM CuSO <sub>4</sub> | 0 h, 22 h and 44 h | 22 h          | 15.47 ± 1.37 |          |

A<sub>pU<sub>lac</sub></sub> was employed as the blank control to eliminate the interference of background enzyme activity.

**Table S4 Optimization of extracellular laccase production from the recombinant *P. putida* A514 strains by the TVSS strategy.**

| Enzyme                                               | Strain                           | Parameter                           | Range              | Optimum range  | Optimum Activity U/mL |
|------------------------------------------------------|----------------------------------|-------------------------------------|--------------------|----------------|-----------------------|
| <b>Laccase<br/>(Peri.)<sup>a</sup></b>               | A <sub>p</sub> G1543             | TAT signal peptides                 | 1543               | 2816           | 16.65 ± 0.86          |
|                                                      | A <sub>p</sub> G2816             |                                     | 2816               |                |                       |
|                                                      | A <sub>p</sub> G4529             |                                     | 4529               |                |                       |
|                                                      | A <sub>p</sub> G2816             | Vectors                             | pPROBE-GT          | pUCP18-Gm      | 49.16 ± 1.63          |
|                                                      | A <sub>p</sub> U2816             |                                     | pUCP18-Gm          |                |                       |
|                                                      | A <sub>p</sub> U2816             | TatABC transporters                 | Without TatABC     | without TatABC | 50.08 ± 1.65          |
| A <sub>p</sub> UV-ABC-2816                           | P <sub>van::tatA tatB tatC</sub> |                                     |                    |                |                       |
| A <sub>p</sub> UM-ABC-2816                           | P <sub>min::tatA tatB tatC</sub> |                                     |                    |                |                       |
| <b>Laccase<br/>(Extra.<br/>attached)<sup>b</sup></b> | A <sub>p</sub> UV1761            | β domain                            | 1761               | 2541A          | 15.99 ± 2.02          |
|                                                      | A <sub>p</sub> UV2541A           |                                     | 2541A              |                |                       |
|                                                      | A <sub>p</sub> UV3548            |                                     | 3548               |                |                       |
|                                                      | A <sub>p</sub> UV4947            |                                     | 4947               |                |                       |
|                                                      | A <sub>p</sub> UV2541A           | Linker domain                       | 2541A              | 2541D          | 23.42 ± 2.41          |
|                                                      | A <sub>p</sub> UV2541B           |                                     | 2541B              |                |                       |
|                                                      | A <sub>p</sub> UV2541C           |                                     | 2541C              |                |                       |
|                                                      | A <sub>p</sub> UV2541D           |                                     | 2541D              |                |                       |
|                                                      | A <sub>p</sub> UV-2541D          | Time point of adding<br>2 mM xylose | 0 h<br>9 h<br>23 h | 9 h            | 84.26 ± 1.81          |

|                                    |                                                |                                         |                |                |
|------------------------------------|------------------------------------------------|-----------------------------------------|----------------|----------------|
|                                    | Temperature                                    | 20-28 °C                                | 25 °C          | 109.29 ± 11.31 |
|                                    | Agitation                                      | 50-150 rpm                              | 150 rpm        | 109.29 ± 11.31 |
|                                    | Time point of adding<br>1 mM CuSO <sub>4</sub> | 0 h<br>22 h<br>45 h                     | 22 h           | 298.64 ± 13.71 |
| <i>A</i> <sub>pUV-2541D</sub>      |                                                | Without TatABC                          |                |                |
| <i>A</i> <sub>pUVV-ABC-2541D</sub> | TatABC transporters                            | <i>P</i> <sub>van::tatA tatB tatC</sub> | without TatABC | 298.64 ± 13.71 |
| <i>A</i> <sub>pUVM-ABC-2541D</sub> |                                                | <i>P</i> <sub>min::tatA tatB tatC</sub> |                |                |

---

<sup>a</sup> Laccase activity in the periplasmic space.

<sup>b</sup> Laccase was displayed on the cell surface. Its activity was detected by the whole-cell laccase activity assay, where *A*<sub>pU<sub>lac</sub></sub> was employed as the blank control to eliminate the interference of background enzyme activity.

**Table S5 Cultivation optimization of the recombinant *P. putida* A514 strains in M9-lignin rich medium.**

| Strain                 | Parameter          | Range                                                              | Optimum range                  | CFU growth folds  | Lignin utilization |
|------------------------|--------------------|--------------------------------------------------------------------|--------------------------------|-------------------|--------------------|
| A <sub>pU</sub>        | Origin             | \                                                                  | \                              | 450 ± 49          | 2.65% ± 3.32%      |
| A <sub>pUI-2549</sub>  |                    |                                                                    |                                | 1141 ± 92         | 4.29% ± 0.16%      |
| A <sub>pUV-2541D</sub> |                    |                                                                    |                                | 937 ± 75          | 4.78% ± 0.64%      |
| A <sub>pU</sub>        | Cu <sup>2+</sup>   | 10 µM Cu <sup>2+</sup> at 36 h plus 10 µM Cu <sup>2+</sup> at 48 h | 20 µM Cu <sup>2+</sup> at 36 h | 2533 ± 250        | 4.70% ± 0.03%      |
| A <sub>pUI-2549</sub>  |                    | 20 µM Cu <sup>2+</sup> at 36 h                                     |                                | 2050 ± 263        | 7.27% ± 0.71%      |
| A <sub>pUV-2541D</sub> |                    | 20 µM Cu <sup>2+</sup> at 36 h                                     |                                | 1378 ± 125        | 7.64% ± 0.31%      |
| A <sub>pU</sub>        | NH <sub>4</sub> Cl | 0.25, 0.5 and 1 g/L                                                | 0.5 g/L                        | 301328 ± 1286     | 4.56% ± 2.40%      |
| A <sub>pUI-2549</sub>  |                    |                                                                    |                                | 2159289 ± 11593   | 10.42% ± 1.80%     |
| A <sub>pUV-2541D</sub> |                    |                                                                    |                                | 315436 ± 9012     | 8.74% ± 0.46%      |
| A <sub>pU</sub>        | Yeast Extract      | 0.05% and 0.1%                                                     | 0.1%                           | 411656 ± 1466     | 4.97% ± 1.13%      |
| A <sub>pUI-2549</sub>  |                    |                                                                    |                                | 19875974 ± 290525 | 13.72% ± 0.99%     |
| A <sub>pUV-2541D</sub> |                    |                                                                    |                                | 21559069 ± 906720 | 9.89% ± 0.47%      |
| A <sub>pU</sub>        | xylose             | 3, 5, 7 and 12 mM                                                  | 5 mM                           | 14852708 ± 445258 | 6.98% ± 0.96%      |
| A <sub>pUI-2549</sub>  |                    |                                                                    |                                | 31480027 ± 802956 | 12.01% ± 0.99%     |
| A <sub>pUV-2541D</sub> |                    |                                                                    |                                | 29228019 ± 308002 | 9.09% ± 3.48%      |
| A <sub>pU</sub>        | Inoculum size      | 10 <sup>3</sup> , 10 <sup>4</sup> and 10 <sup>5</sup> CFUs/mL      | 10 <sup>4</sup> CFUs/mL        | 19607520 ± 84439  | 4.62% ± 1.16%      |
| A <sub>pUI-2549</sub>  |                    |                                                                    |                                | 52682480 ± 132249 | 12.58% ± 0.37%     |
| A <sub>pUV-2541D</sub> |                    |                                                                    |                                | 49584584 ± 322426 | 12.13% ± 0.72%     |

Table S6 Primers used in this study.

| Primer       | Sequence                                                          |
|--------------|-------------------------------------------------------------------|
| Lac-Fwd(int) | 5'-TGCCCAGCCGGAGATGGCCCCAGCTGCAAAGGGGATCA-3'                      |
| Lac-Rev      | 5'-TTATCGGTACCTCAGTGGTGGTGGT-3'                                   |
| oprI-F       | 5'-AAAAGTGCAGATGAACAACGTTCTGAAATTCTCTGC-3'                        |
| oprI-R       | 5'-GTGATCCCCTTTGCAGCTGGACCCATGCTGCTGCAACC-3'                      |
| pbp-F        | 5'-TTCCCTGCAGATGAAACTGAAACGTTTGATGGCGGCAATGACTTTTGTGCTGCTGGCGT-3' |
| pbp-F(-lac)  | 5'-TTTTGTGCTGCTGGCGTTGCGACCGTCAACGCGGTGGCCCCAGCTGCAAAGGGG-3'      |
| pelb-F       | 5'-GCCGATCTGCAGATGAAATACCTGCTGCCGACC-3'                           |
| pelB-R       | 5'-TGATCCCCTTTGCAGCTGGGGCCATCGCCGGCTGGGCA-3'                      |
| 383-F        | 5'-GTCCCTGCAGATGAACCCTAGCCTGACTGAT-3'                             |
| 383-R        | 5'-GTGATCCCCTTTGCAGCTGGGGCAAAGCCGCTGGCC-3'                        |
| 620-F        | 5'-GTCCCTGCAGATGACTACGCGCAACCCA-3'                                |
| 620-R        | 5'-GTGATCCCCTTTGCAGCTGGGCCGCCCCGTTGCGG-3'                         |
| 1543-F       | 5'-AAAAGTGCAGATGCACCGCAGGAATTTGC-3'                               |
| 1543-R       | 5'-GTGATCCCCTTTGCAGCTGGACGGTTTGCGGCCCAG-3'                        |
| 1921-F       | 5'-TCACACAAGGAGCTGCAGATGAGCAATGACGGCGTG-3'                        |

|                 |                                                             |
|-----------------|-------------------------------------------------------------|
| 1921-R          | 5'-GTGATCCCCTTTGCAGCTGGTGCACCTGCGGCTTTCG-3'                 |
| 2816-F          | 5'-GTCCCTGCAGATGAGTGATTCAGAACAATTTTCAGC-3'                  |
| 2816-R          | 5'-GTGATCCCCTTTGCAGCTGGGGCGGCGGCGGCCGCCATGGCCGGGCAGGT-3'    |
| 4529-F          | 5'-TTCCCTGCAGATGTCTGATCAAGATCAAGACAACC-3'                   |
| 4529-R          | 5'-GTGATCCCCTTTGCAGCTGGCTTGGCCGGAGCGGC-3'                   |
| 4580-F          | 5'-AAAAGTGCAGATGTTAATCAAGATCCCCAAAGCG-3'                    |
| 4580-R          | 5'-GTGATCCCCTTTGCAGCTGGAGCATCGTCCGCACTGG-3'                 |
| Gm F            | 5'-GCCGCTCGAGTTGACATAAGCCTGTTCCGGTTC-3'                     |
| Gm R            | 5'-ACGGGGTACCTTAGGTGGCGGTACTIONTGGGT-3'                     |
| 2544-F(XbaI)    | 5'-CTAGTCTAGAATATGACCGCCGGGATGATGA-3'                       |
| 2542-R(Sac I)   | 5'-TTGCGAGCTCCGGTGAATCGGTGATCATCTAA-3'                      |
| Pmin-F(HindIII) | 5'-ACGCAAGCTTATTGAAATAGCTGAGACACAAGCG-3'                    |
| Pmin-R(XbaI)    | 5'-ATGCTCTAGACTCCTAGTGTGAAATTGTTATCCGC-3'                   |
| rrnB-F(Sac I)   | 5'-AGACGAGCTCCAAATAAAACGAAAGGCTCAGTCG-3'                    |
| rrnB-R(-xylR)   | 5'-GCTAAGATCGTTCCCACGTGCGAAAAGGCCATCCGTCAGGAT-3'            |
| xylR-F(BamHI)   | 5'-TCGCGGATCCGCACGTGGGAACGATCTTA-3'                         |
| xylA-R(SmaI)    | 5'-TTCCCCGGGCTCCTTATTGTTCTTGGCGGTG-3'                       |
| LAC-F           | 5'-ATCATCACAGCAGCGGCCTGGTGCCGCGCGGCAGCATGCCAGCTGCAAAGGGG-3' |

|                    |                                                       |
|--------------------|-------------------------------------------------------|
| LAC-F 2            | 5'-CACCGCCCCGGGATGCATCATCATCATCACAGCAGCGGCC-3'        |
| 2539-F(for lac)    | 5'-CCTGGAAGTTCTGTTCCAGGGGCCCAATGCCGAACCGCACAAG-3'     |
| 2539-R(-rrnb)      | 5'-CTGAGCCTTTCGTTTTATTGGGTGATCAGCCGATGCTGA-3'         |
| 2549-F(for lac)    | 5'-CCTGGAAGTTCTGTTCCAGGGGCCAAGGGCGTTACCGTCGAGA-3'     |
| 2549-R(-rrnb)      | 5'-CTGAGCCTTTCGTTTTATTGCCTAAGTCACGCTACGATGTCGCTG-3'   |
| rrnb-R(XhoI)       | 5'-CCGCTCTAGAAAAAGGCCATCCGTCAGGAT-3'                  |
| 2816-F(SmaI)       | 5'-GTCCCCCGGGATGAGTGATTCAGAACAATTTTCAGC-3'            |
| Pvan-F(Hind III)   | 5'-GCCTAAGCTTCCTTGATGGGTTGGGTGTCC-3'                  |
| Pvan-R(XbaI)       | 5'-TCGCTCTAGACTCCTTGACATGGGAGGCTCTCCG-3'              |
| tatA-F(XbaI)       | 5'-GGGCTCTAGAATGGGCATTTTTGACTGGAAACA-3'               |
| tatC-R(-rrnb SacI) | 5'-GACTGAGCCTTTCGTTTTATTGGAGCTCAAGTAGCAGCAGGTTACGG-3' |
| 1761-F(KpnI)       | 5'-ACGCGGTACCCGTAACCAGACGAGTTTTGCC-3'                 |
| 1761-R(XhoI)       | 5'-TCCGCTCGAGTTAGAAGCGGAATGTAAACCCG-3'                |
| 2541-F(KpnI)       | 5'-ACGGGTACCCAAGCACCGAATACTATCGTGG-3'                 |
| 2541-R(XhoI)       | 5'-TGCCCTCGAGCTAGAACTGCCAGTTCAGGCT-3'                 |
| 3548-F(KpnI)       | 5'-ACTGGGTACCGCCGGTGCAGGTGCCAG-3'                     |
| 3548-R(XhoI)       | 5'-ACCGCTCGAGTCAGAACGCGTAACGCGCTTTGA-3'               |
| 4947-F(KpnI)       | 5'-ACGGGTACCCAACAACACTGATCGCCGACTAC-3'                |

|                      |                                                                      |
|----------------------|----------------------------------------------------------------------|
| 4947-R(XhoI)         | 5'-TACCCTCGAGTCAGAAATCCAGACTCACCCC-3'                                |
| 2541-F K2            | 5'-ATGGGGTACCGGGCAGGGCGATGTGTG-3'                                    |
| 2541-F K3            | 5'-ATGGGGTACCGGCAGCCTGATCAAATCCG-3'                                  |
| 2541-F K4            | 5'-ACGGGGTACCAACAACGCCACATTCGCCAG-3'                                 |
| xylR-F(BamHI)        | 5'-TCGCGGATCCGCACGTGGGAACGATCTTA-3'                                  |
| 2816-Myc R           | 5'-TCTGAGATGAGTTTTTTGTTTCAGCTGCGGGCGGCGGCGGCGGCCATGGCCGGGCAGGT-3'    |
| myc-his R            | 5'-GATGATGATGGTTCGACGGCGCTATTCAGATCCTCTTCTGAGATGAGTTTTTTGTTTCAGCT-3' |
| his-thrombin R       | 5'-CCTCCGCTGCCGCGCGGCACCAGGCCGCTGCTGTGATGATGATGATGATGGTCGACGGC-3'    |
| thrombin-lac F       | 5'-ATCACAGCAGCGGCCTGGTGCCGCGCGGCAGCGGAGGTTCCATGCCAGCTGCAAAGGGG-3'    |
| lac-thrombin R(KpnI) | 5'-TTGTGGTACCTGCGCTGCCGCGCGGCACCAGGCCGCTGCTGTGTTTCGTGCTCATGGGC-3'    |
| his-lac F            | 5'-CCGCCGCCGAGCTCATCATCATCATCATAGCAGCGGCATGCCAGCTGCAAAGGGG-3'        |
| 2816-his R           | 5'-CTATGATGATGATGATGATGAGCTGCGGGCGGCGGCGGCCGCGGCCATGGCCGGGCAGGT-3'   |
| thrombin R(KpnI)     | 5'-TAAGGGTACCAGCTGGCATGGAACCTCC-3'                                   |

---
