# Supplementary material for: Efficient extracellular laccase secretionviabio-designed secretory apparatuses to enhance bacterial utilization of recalcitrant lignin
Source: Royal Society of Chemistry journal article supplement (doi:10.1039/d0gc04084c), 2021-01-01
Supplement: d0gc04084c2.pdf [file d0gc04084c2.pdf]

### Supplementary Figures

**Figure S1 SDS-PAGE analysis of the overexpressed intracellular laccase protein in  $A_{pGlac}$ .**  $A_{pGT}$  was used as the control. Red arrow indicates the laccase protein band, while green arrow denotes the green fluorescent protein located in the laccase operon. Biological triplicates were performed.

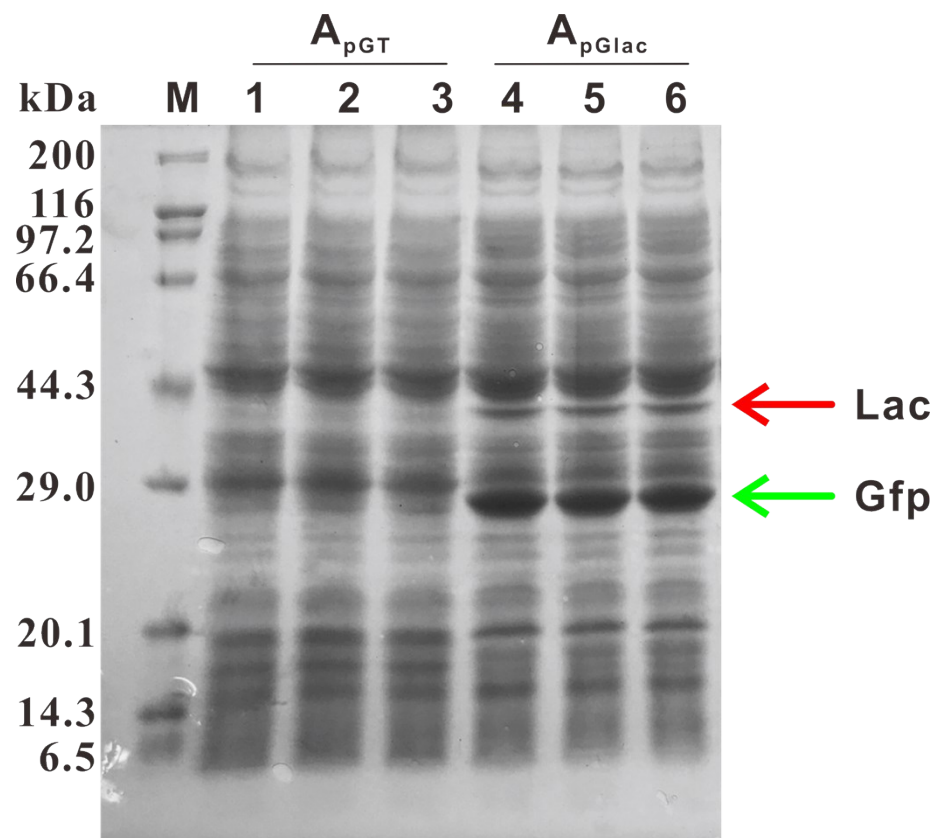

**Figure S2 The laccase activity and cell growth of the recombinant A514 strains in TISS strategy.** (A) The intracellular laccase activity of  $A_{pULac}$ ,  $A_{pUI-2539}$ , and  $A_{pUI-2549}$ . (B) The growth curves of  $A_{pUI-2549}$  under different xylose addition time points. (C) The time point-dependent induction of real-time extracellular laccase activity in  $A_{pUI-2549}$ . 2 mM xylose (final concentration) was added at different time points.

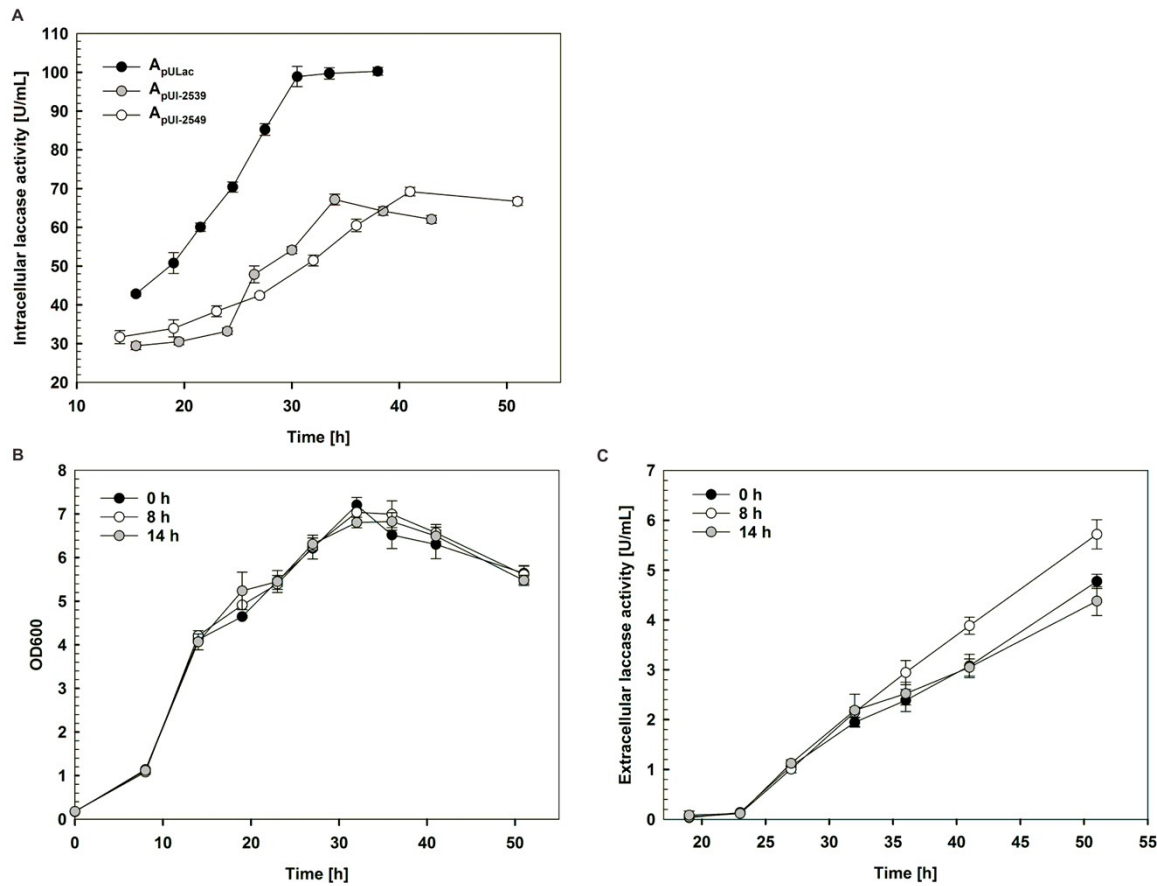

**Figure S3 Periplasmic and cell-bound laccase activities for the recombinant A514 strains in TVSS strategy.** (A) The real-time periplasmic laccase activities for the recombinant A514 strains with laccase integrated with different N-terminal Tat signal peptides.  $A_{pGlac}$ , which doesn't carry N-terminal signal peptides, was used as the control. (B) Whole-cell laccase activity of the recombinant A514 strains, where laccase was integrated with different  $\beta$  domains. N:  $A_{pU2816}$ , which doesn't carry any C-terminal regions, was used as the blank control.

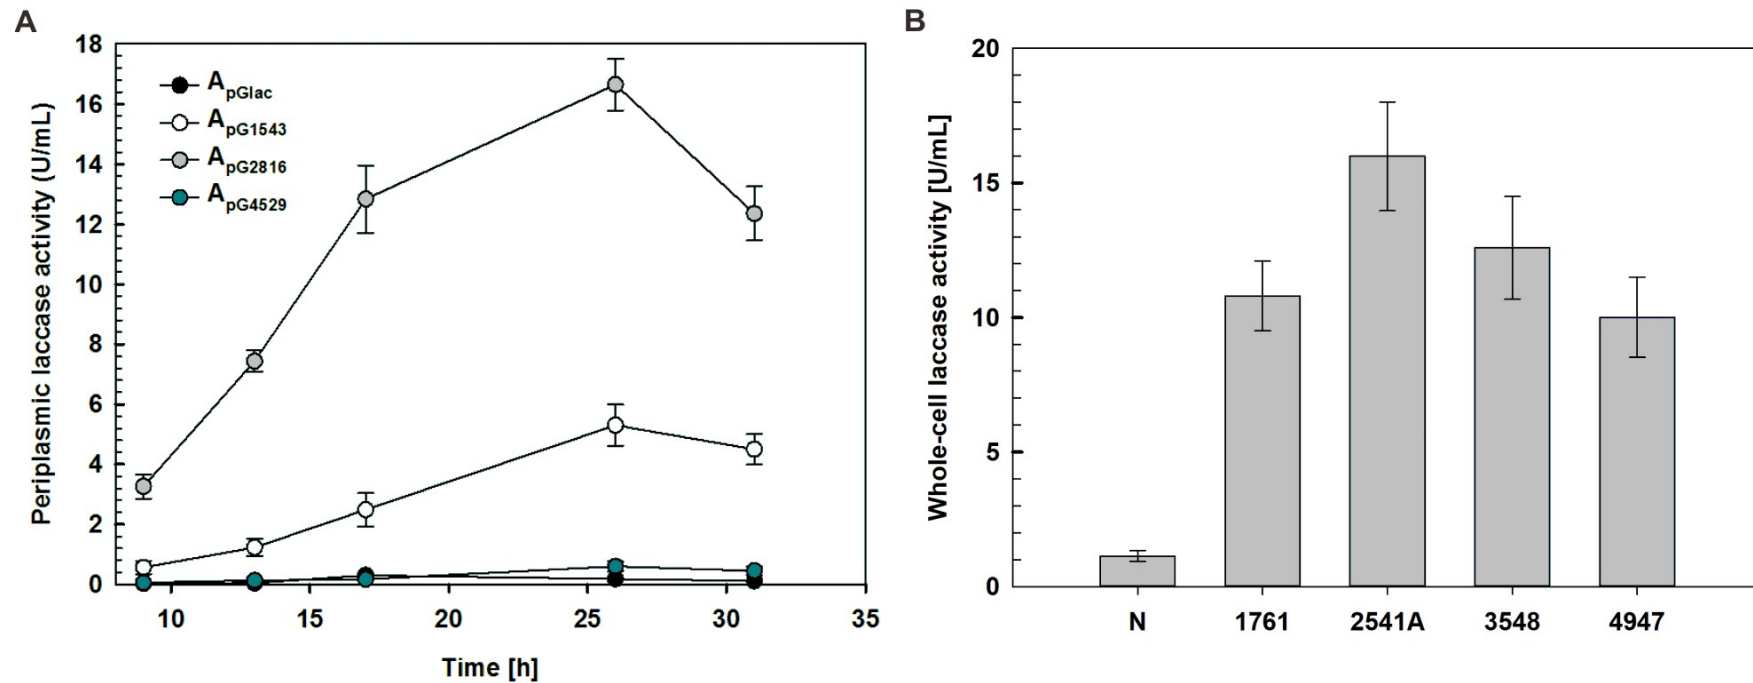

**Figure S4 Definition of the optimal 2541 linker.** (A) Sequential deletions of the putative linker domain. (B) The linker domain possesses a conserved  $\alpha$ -helical region. Sequence was analyzed using Protein Calculator v 3.4. (C) Secretion efficiency of different 2541 linker regions. Analysis was performed using anti-myc ELISA. Without laccase: the passenger domain contains c-myc epitope. With laccase: the passenger domain contains c-myc epitope and laccase. (D) The cell growth (dotted line) and whole-cell laccase activities (bar) of  $A_{pUV-2541A}$ ,  $A_{pUV-2541B}$ ,  $A_{pUV-2541C}$ , and  $A_{pUV-2541D}$ .

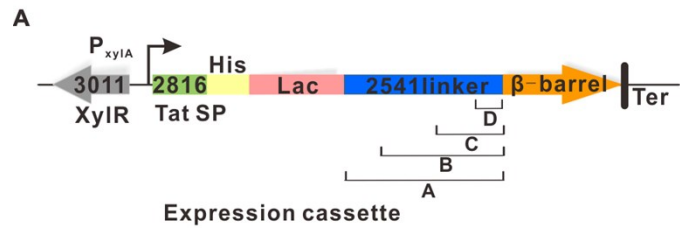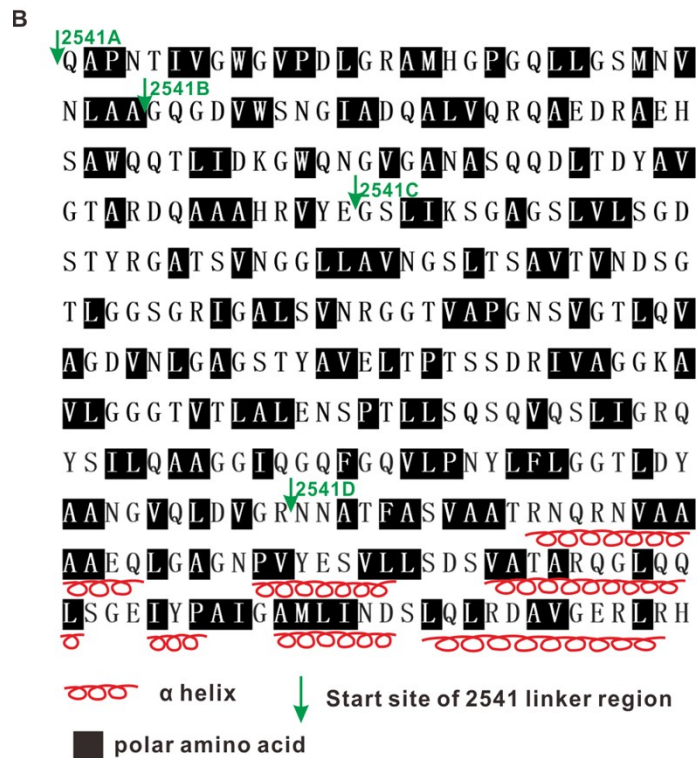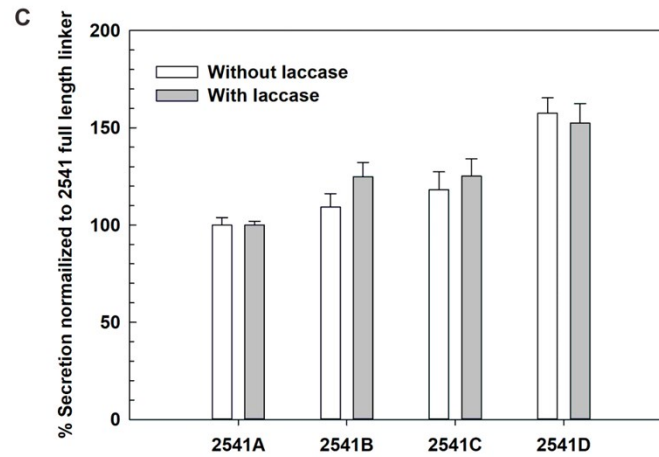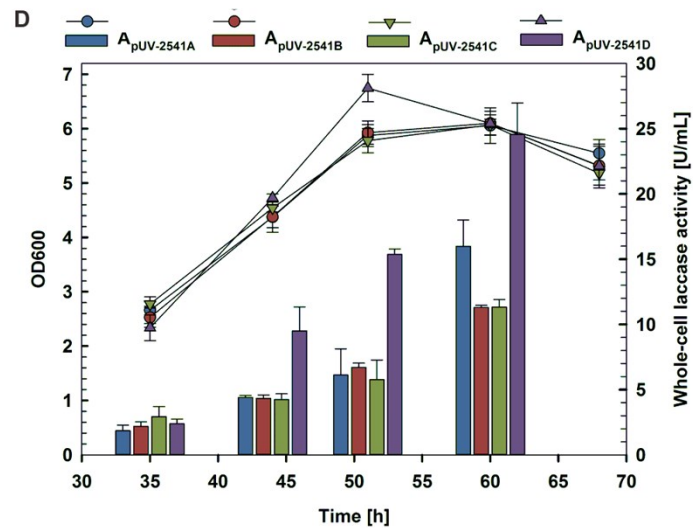

Figure S5 The proposed lignin oxidation by bacterial laccase <sup>1-4</sup>.

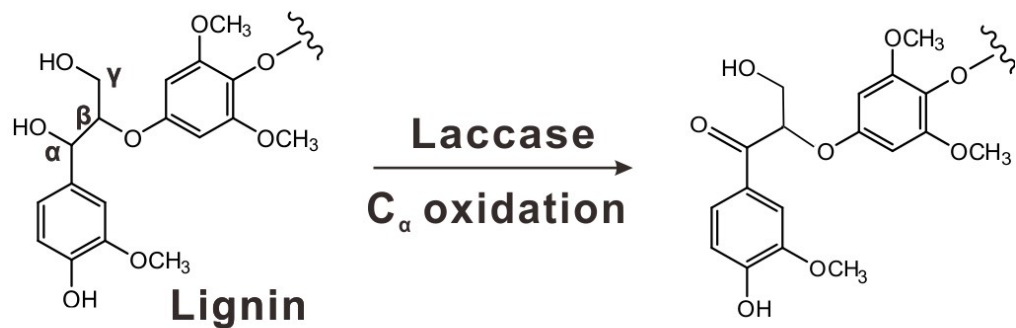

Figure S6 GPC chromatograms for untreated lignin (control), laccase alone,  $A_{pU}$ ,  $A_{pUI-2549}$  and  $A_{pUV-2541D}$  treated lignin.

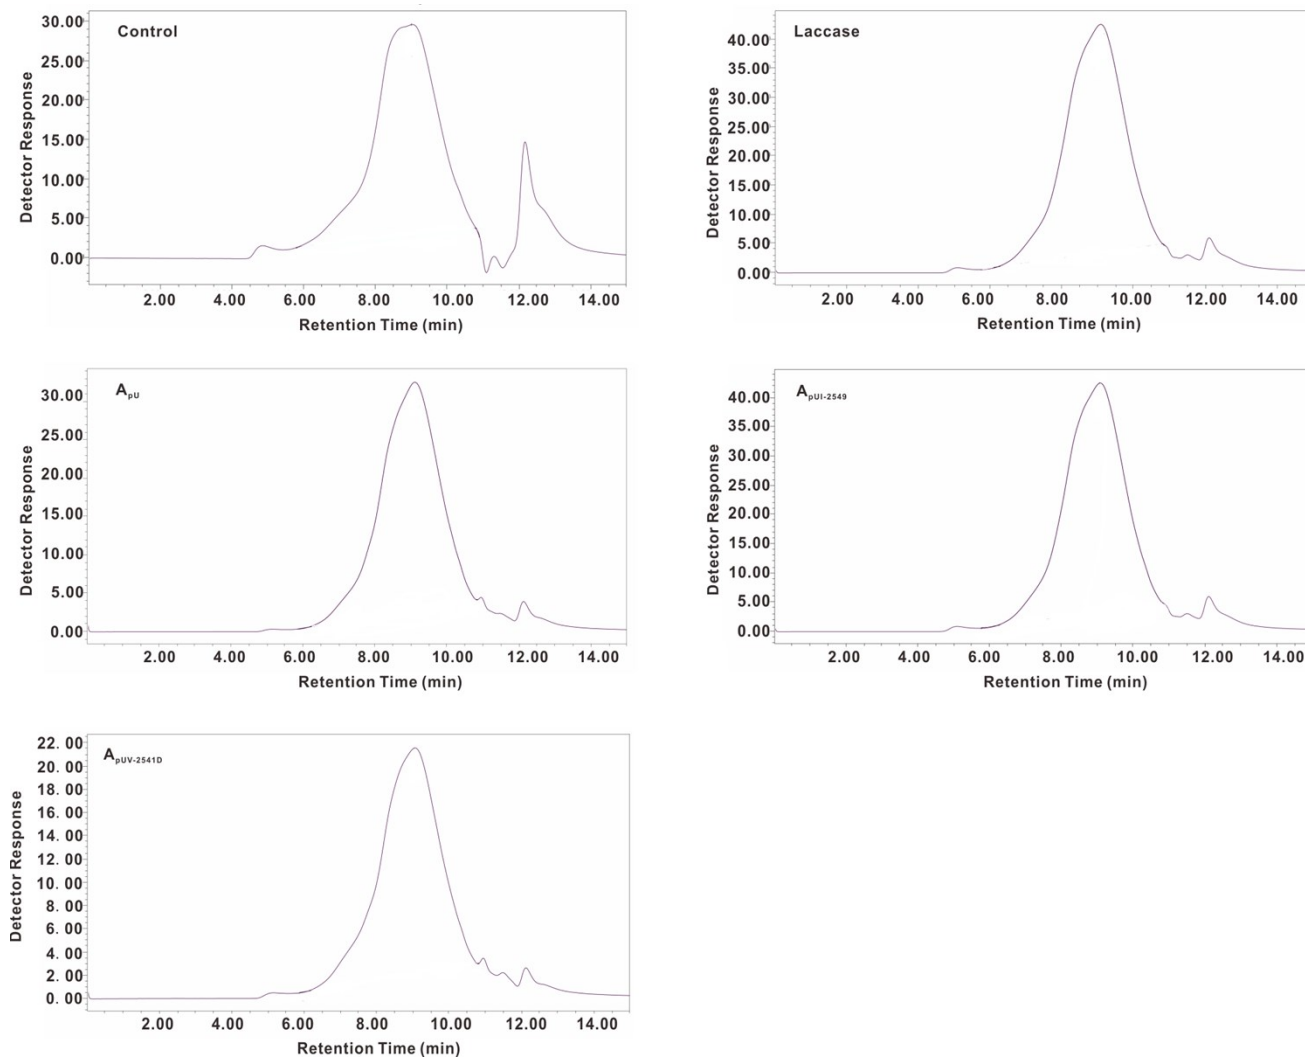

**Figure S7 Vanillic acid was consumed by  $A_{pU}$ ,  $A_{pUI-2549}$ , and  $A_{pUV-2541D}$ .** (A) The relative abundance patterns of vanillic acid during the five cultivation days as detected by GC-MS/MS analysis.  $A_{pU}$ ,  $A_{pUI-2549}$ , and  $A_{pUV-2541D}$  were grown in lignin-M9 rich medium at 28 °C, 150 rpm. (B) Growth curves and vanillic acid degradation curves. Strains were cultured in 15 mM vanillic acid-M9 mineral medium at 28 °C and 150 rpm. VA: vanillic acid.

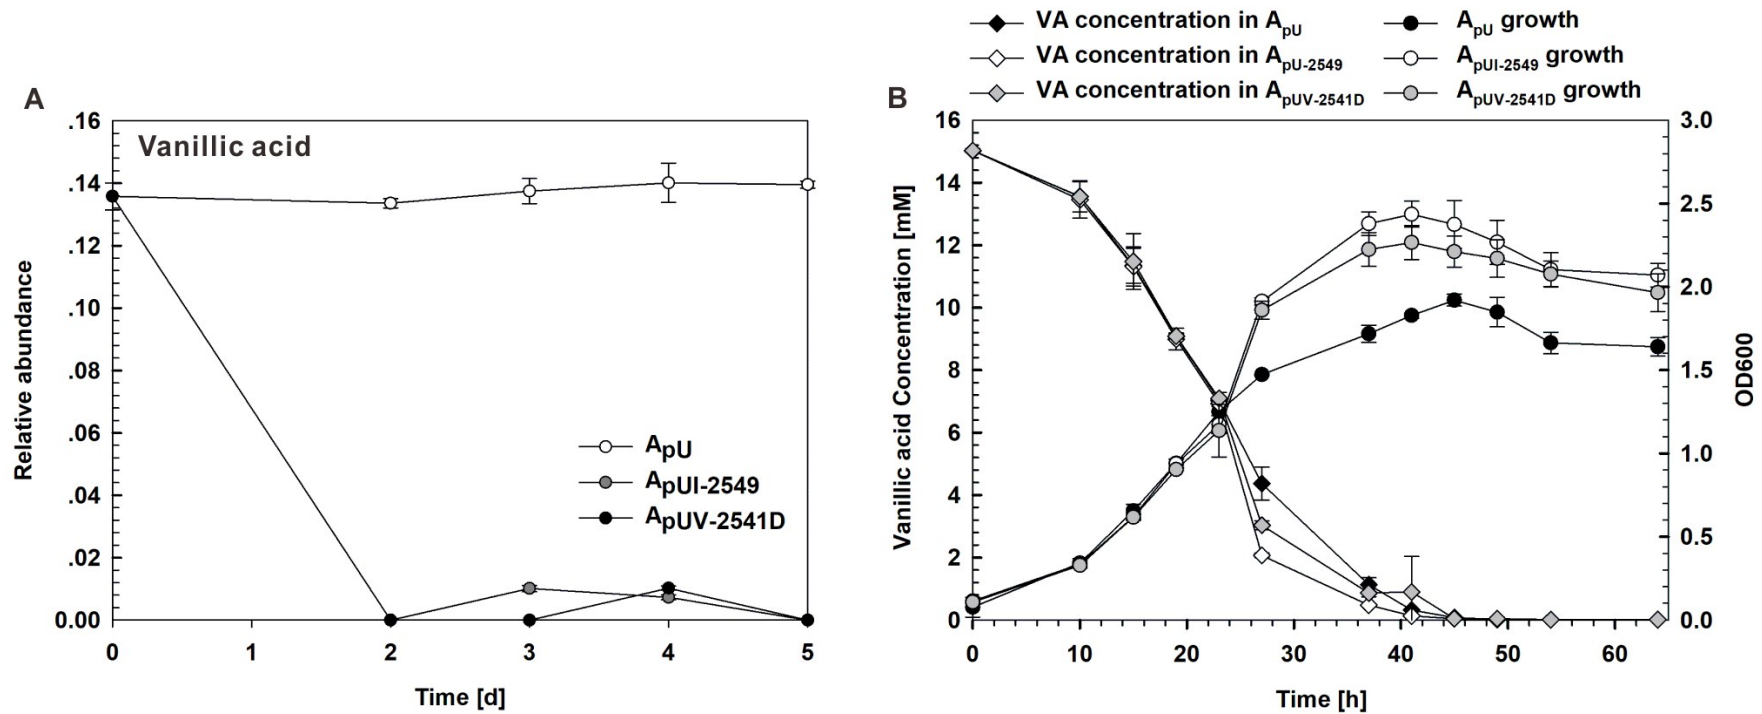



References:

1. R. Hilgers, J. P. Vincken, H. Gruppen and M. A. Kabel, *ACS Sustain Chem Eng*, 2018, **6**, 2037-2046.
2. G. M. Rashid, C. R. Taylor, Y. Liu, X. Zhang, D. Rea, V. Fülöp and T. D. Bugg, *ACS Chem Biol*, 2015, **10**, 2286-2294.
3. S. Majumdar, T. Lukk, J. O. Solbiati, S. Bauer, S. K. Nair, J. E. Cronan and J. A. Gerlt, *Biochemistry*, 2014, **53**, 4047-4058.
4. S. Xie, Q. Sun, Y. Pu, F. Lin and J. S. Yuan, *ACS Sustain Chem Eng*, 2016, **5**, 2215-2223.
